# Supplementary material for: Optimized Null Model for Protein Structure Networks
Source: PLOS journal article supplement (doi:10.1371/journal.pone.0005967), 2009-06-25
Supplement: S4 (10.1371/journal.pone.0005967.s004) [file journal.pone.0005967.s004]

Table S2. Pairwise comparison of the fit of GEO-3D to monomeric and to multimeric proteins with respect to different network properties, and comparison of their size, clustering coefficients, and average diameters. The column denoted by “Property” contains the evaluated network property. The column denoted by “Mono” contains the mean value of the corresponding network property for monomeric proteins. The column denoted by “Multi” contains the mean value of the corresponding network property for multimeric proteins. The column denoted by “Difference” contains the mean paired difference between values for monomeric proteins and values for multimeric proteins, for a given network property (top number). Also, this column contains  $p$ -value (“ $p$ ”) of the difference in the fit of GEO-3D to Mono and Multi proteins, obtained by Student’s paired  $t$ -test (bottom number); statistically significant differences (bolded) are determined with the threshold of  $p=0.05/10=0.005$ , including the Bonferroni correction over 10 tests for 5% significance threshold.

| Property                                                  | Mono     | Multi    | Difference                                       |
|-----------------------------------------------------------|----------|----------|--------------------------------------------------|
| GDD-agreement                                             | 0.7171   | 0.7153   | 0.0018<br>$p = 0.2584$                           |
| RGF-distance                                              | 11.2578  | 11.2188  | 0.039<br>$p = 0.4377$                            |
| Pearson correlation between degree distributions          | 0.7285   | 0.73     | -0.0014<br>$p = 0.3964$                          |
| Percentage difference of clustering coefficients          | 7.4296   | 7.323    | 0.1067<br>$p = 0.3865$                           |
| Pearson correlation between clustering spectra            | 0.3736   | 0.4062   | -0.0325<br>$p = 0.0288$                          |
| Percentage difference of average diameters                | 5.0247   | 5.8833   | -0.8586<br>$p = 0.1416$                          |
| Pearson correlation between shortest path lengths spectra | 0.9718   | 0.967    | 0.0048<br>$p = 0.1081$                           |
| Number of edges                                           | 813.2733 | 798.9467 | <b>14.3267</b><br><b><math>p = 0.0038</math></b> |
| Clustering coefficient                                    | 0.5317   | 0.5364   | -0.0048<br>$p = 0.0226$                          |
| Average diameter                                          | 3.4331   | 3.6439   | <b>-0.2108</b><br><b><math>p = 0.0002</math></b> |
